# Supplementary material for: SNAI1-Driven Sequential EMT Changes Attributed by Selective Chromatin Enrichment of RAD21 and GRHL2
Source: Cancers (Basel). 2020 May 2;12(5):1140. doi: 10.3390/cancers12051140 (PMC7281482; doi:10.3390/cancers12051140)
Supplement: Supplementary file 1 [file cancers-12-01140-s001.pdf]

# Supplementary Material: SNAI1-Driven Sequential EMT Changes Attributed by Selective Chromatin Enrichment of RAD21 and GRHL2

Vignesh Sundararajan, Ming Tan, Tuan Zea Tan, Qing You Pang, Jieru Ye, Vin Yee Chung and Ruby Yun-Ju Huang

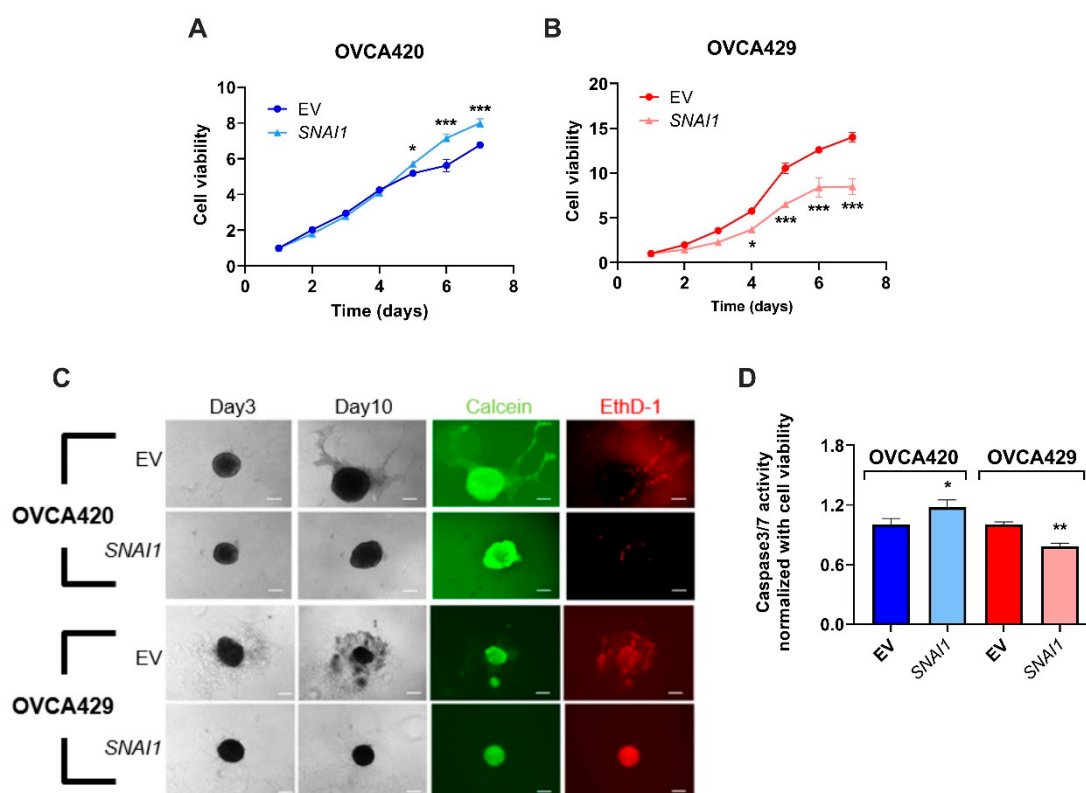

**Figure S1.** *SNAI1* overexpressing cells in ovarian cancer cells induce differential functional changes. (A,B) Line graphs representing cell viability ( $y$ -axis) over time ( $x$ -axis) of control (EV) and *SNAI1* overexpression clones, that are normalized with time point Day 1. (C) Phase contrast images of control (EV) and *SNAI1* overexpression clones grown as spheroids with the addition of spheroid formation agent for three days in round bottom ULA culture plates (Day 3) and subsequently embedded in invasion matrigel until Day 10. Green channels indicate the Calcein-AM (Calcein) signals for live cells while red channels indicate the ethidium homodimer-1 (EthD-1) for dead cells. Scale bars represent 100  $\mu$ m. (D) Control (EV) and *SNAI1* overexpression clones were seeded at a density of 10,000 cells per well in flat bottom ULA culture plates for 3 wells per clone. After 72 h, cell viability for live cells was first measured by Luminescent Cell Viability Assay followed by the measuring the caspase 3/7 activity for dying cells. Caspase 3/7 activity was divided by cell viability for the same well. Y-axis stands for the normalized caspase 3/7 activities for *SNAI1* overexpression cells compared to their respective controls. Statistical significance was determined by unpaired  $t$ -tests; \*  $p < 0.05$ ; \*\*  $p < 0.01$ .

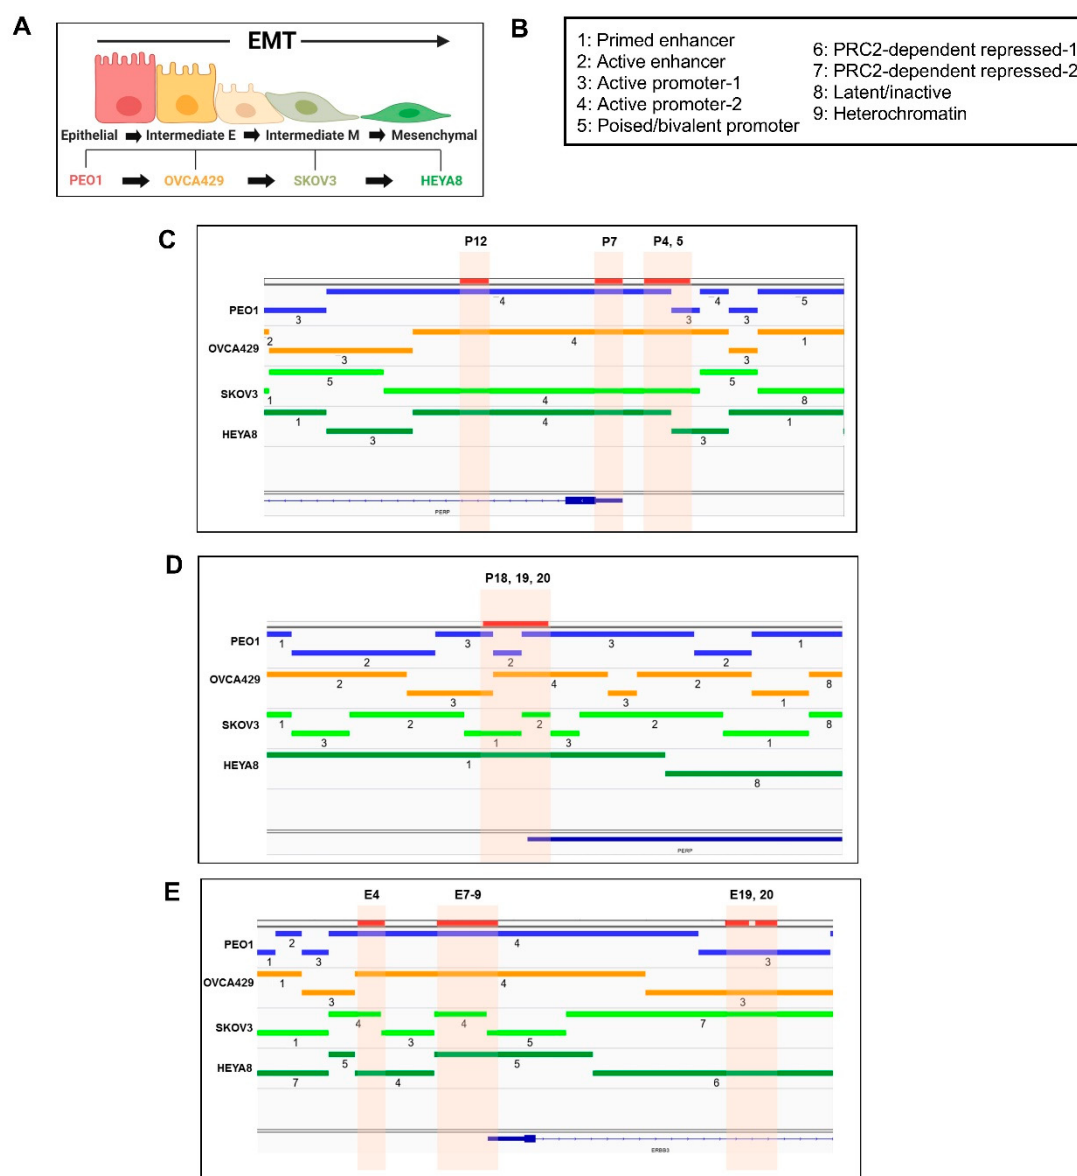

**Figure S2.** Chromatin states at *PERP* and *ERBB3* amplicon regions in four-cell-line EMT spectrum model. (A) Illustration showing the four-cell line model representing cellular states along the EMT spectrum. PEO1 (Epithelial), OVCA429 (Intermediate epithelial), SKOV3 (Intermediate mesenchymal), and HEYA8 (Mesenchymal). (B) Nine ChromHMM states encompassing combinatorial histone H3 chromatin immunoprecipitation (ChIP)-sequencing that were previously described by our group [1]. (C–E) Snapshots of human *PERP* (B,C) and *ERBB3* (D) loci showing ChromHMM state (indicated in number codes depicted in Figure S5A) in the four-cell-line EMT spectrum model: Amplicon regions were highlighted in red.

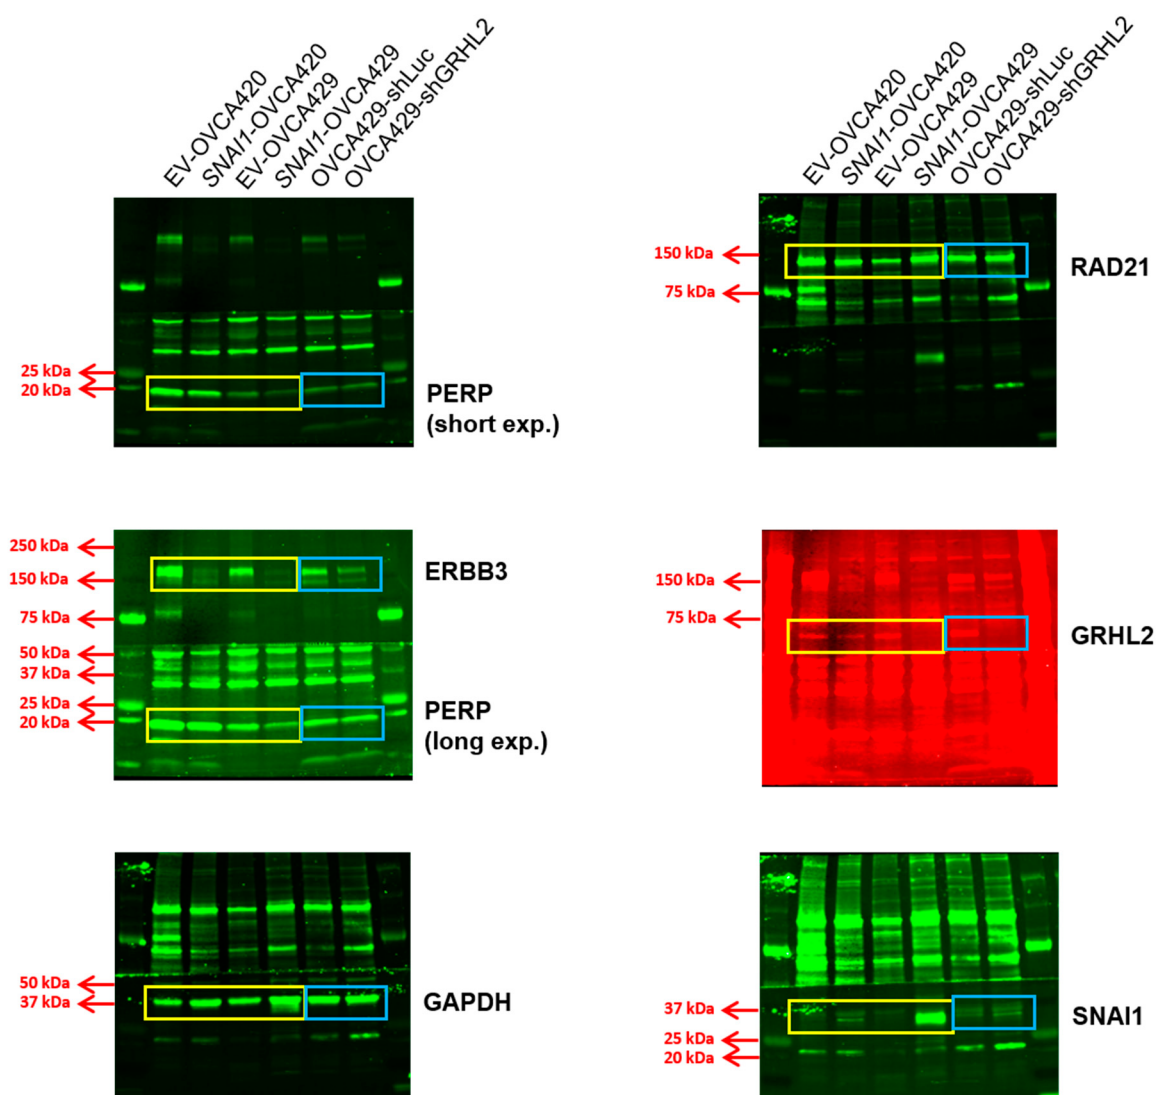

**Figure S3.** Full-length blots. Bands that are indicated in yellow used to construct Figure 2D and those indicated in blue are used to construct Figure 4D.

**Table S1.** List of primers used for ChIP analysis.

| ChIP amplicons | Coordinates based on hg 38 human genomic annotation |           | Primers                      |                               | Amplicon size | Amplicon position in bps relative to TSS | Genomic location |
|----------------|-----------------------------------------------------|-----------|------------------------------|-------------------------------|---------------|------------------------------------------|------------------|
|                | Start                                               | End       | Forward                      | Reverse                       |               |                                          |                  |
| P4             | 138107799                                           | 138107992 | CAGGAAAG<br>AACAGCAT<br>GCAA | CAGCAGTGT<br>GAGATGGGT<br>GT  | 194           | -275 to -469                             | Promoter         |
| P5             | 138107673                                           | 138107852 | AGGAGTGC<br>AGCCTTTAT<br>CCA | AGGCGCGTG<br>TTTTGTCTTC       | 180           | -149 to -329                             | Promoter         |
| P7             | 138107330                                           | 138107524 | GCTCTGAGT<br>CACCGGAAT<br>CT | CAGCGGATC<br>ATGTTGACG        | 195           | -1 to +194                               | 5'UTR            |
| P12            | 138106390                                           | 138106592 | CCGTCAGG<br>CTAGTTCTT<br>GT  | ATGCTGGGA<br>AAATGGCAT<br>AC  | 203           | +931 to +1134                            | Intron1          |
| P18            | 138088442                                           | 138088648 | GGTGTGGAA<br>AAAGCCAA<br>GAA | CAGGATTCC<br>ATTTCTTCA<br>CCA | 207           | +18875 to +19082                         | 3'UTR            |

|     |           |           |                                |                               |     |                     |             |
|-----|-----------|-----------|--------------------------------|-------------------------------|-----|---------------------|-------------|
| P19 | 138088330 | 138088513 | GGAAACTC<br>AGAAGTGTG<br>TGAGC | CCTTGAGTC<br>TTTGCACCTG<br>GA | 184 | +19010 to<br>+19194 | Poly-A tail |
| P20 | 138088194 | 138088381 | TGTTTGTGT<br>AATGGGGTG<br>AC   | CCACATGGA<br>ACTTGCTTT<br>CA  | 188 | +19142 to<br>+19330 | Poly-A tail |
| E4  | 56079034  | 56079243  | AAGGGATT<br>GAAATGCA<br>AGG    | GACGCGGA<br>GAGGACAC<br>TAGA  | 210 | −991 to −781        | Promoter    |
| E7  | 56079635  | 56079809  | GCTGGGTGG<br>ATGAATTAT<br>GG   | CGCCCATTA<br>ACCAAATC<br>ACT  | 175 | −390 to −215        | Promoter    |
| E8  | 56079780  | 56079946  | AGGGGAGTT<br>GAGTGATT<br>GGT   | GATGGGGCT<br>CACCCTAAT<br>TT  | 167 | −245 to −78         | 5'UTR       |
| E9  | 56079891  | 56080099  | GAATCTCGA<br>CCTCCCCTT<br>G    | GAGAGAGA<br>GGGAGGGA<br>GGAA  | 209 | −134 to +75         | 5'UTR       |
| E19 | 56081820  | 56081997  | GGCTGGAG<br>ATTCTGGCT<br>CTA   | AAGGGAGC<br>ACAAACAA<br>CACC  | 178 | +1795 to +1973      | Intron1     |
| E20 | 56082044  | 56082211  | CTCAGGGTA<br>GCAGGGAA<br>CTG   | CGTACACAT<br>TGGTCCTGC<br>TG  | 168 | +2019 to +2187      | Intron1     |

**Table S2.** List of primers used for qPCR analysis.

| Gene          | Catalog no. | Ref Seq Accession no. |
|---------------|-------------|-----------------------|
| <i>ACTB</i>   | PPH00073E   | NM_001101.3           |
| <i>B2M</i>    | PPH01094E   | NM_004048.2           |
| <i>GAPDH</i>  | PPH00150E   | NM_002046.3           |
| <i>HPRT1</i>  | PPH01018B   | NM_000194.2           |
| <i>RPL13A</i> | PPH01020B   | NM_012423.2           |
| <i>GRHL2</i>  | PPH18929F   | NM_024915.3           |
| <i>SNAI1</i>  | PPH02459B   | NM_005985             |
| <i>SNAI2</i>  | PPH02475A   | NM_003068             |
| <i>TWIST1</i> | PPH02132A   | NM_000474.3           |
| <i>ZEB1</i>   | PPH01922A   | NM_030751.5           |
| <i>ZEB2</i>   | PPH09021B   | NM_014795             |
| <i>CDH1</i>   | PPH00135E   | NM_004360.3           |
| <i>ERBB3</i>  | PPH00463B   | NM_001982.3           |
| <i>PERP</i>   | PPH00596F   | NM_022121.5           |

All primers except RAD21 was purchased from Qiagen. RAD21 primer sequences were obtained from a previous report [2], forward primer (TGACTTTGATCAGCCACTGC) and reverse primer (TCTCAGATCATCCATTCCA).

**Table S3.** List of antibodies used in this study.

| Antibody     | Vendor                       | Cat. No#   | Application                          |
|--------------|------------------------------|------------|--------------------------------------|
| BHLHE40      | Novus Biologicals            | NB100-1800 | ChIP                                 |
| E-cadherin   | BD Transduction Laboratories | 610182     | Immunofluorescence, Western blotting |
| ERBB3        | Abcam                        | ab20161    | Western blotting                     |
| GAPDH        | Sigma-Aldrich                | G9545      | Western blotting                     |
| GATA3        | Cell Signaling Technology    | 5852       | ChIP                                 |
| GRHL2        | Sigma-Aldrich                | HPA002820  | ChIP, western blotting               |
| HDAC2        | Abcam                        | ab51832    | ChIP                                 |
| HNF4α        | Abcam                        | ab41898    | ChIP                                 |
| IgG (Rabbit) | Cell Signaling Technology    | 2729       | ChIP                                 |
| IgG (Mouse)  | Santa Cruz                   | sc-2025    | ChIP                                 |

|          |                           |             |                        |
|----------|---------------------------|-------------|------------------------|
| NR2F2    | Perseus                   | PP-H7147-00 | ChIP                   |
| PERP     | Abcam                     | ab5986      | Western blotting       |
| RAD21    | Abcam                     | ab992       | ChIP, western blotting |
| SNAI1    | Cell Signaling Technology | 3879        | Western blotting       |
| TWIST1   | Santa Cruz                | sc-81417    | Western blotting       |
| Vimentin | Dako                      | M7020       | Western blotting       |
| ZEB1     | Cell Signaling Technology | 3396        | Western blotting       |
| ZEB2     | Santa Cruz                | sc-48789    | Western blotting       |

## Supplementary Materials and Methods

### Cell Proliferation Assay

Cells were seeded in 96-well plates at 1000 cells per well. At indicated time points, proliferation rate was measured using MTS reagent mix (#G5430, Promega, Madison, WI, USA), and absorbance recorded at 490 nm using a plate reader (Tecan infinite 200).

### 3D Invasion Assay

3D invasion assay was performed using 96-well 3D Spheroid BME Cell Invasion Assay from Cultrex, Gaithersburg, MD, USA (#3500-096-K) following manufacturer's protocol. Briefly, cells were mixed with kit supplied ECM and seeded into ultra-low attachment plates. The plates were then centrifuged at 500 g for 5 minutes and incubated at 37 °C for 72 hours for spheroid formation. After that, kit supplied BME matrix was added and pre-incubated on ice for 10 minutes, followed by centrifugation at 500 g, 4 °C for 5 minutes. The plates were then cultured for 7 days at 37 °C. Subsequently, cells were stained for 1 hour with Calcein AM (#C3100MP, Life Technologies, California, CA, USA) and Ethidium Homodimer-1 (#E1169, Life Technologies) and imaged using Zeiss Axio Imager M2 fluorescence microscope.

### Anoikis Assay (Caspase 3/7 activity)

For the caspase 3/7 activity assay, 10,000 cells/well were seeded in ULA 96-well plates (#7007; Corning). After 72h, 20 µL of CellTiter-Fluor reagent (for cell viability, #TB371; Promega (Madison, WI, USA)) was added to all the wells and the fluorescence was measured after 1h incubation at 37 °C. Subsequently, 100 µL of caspase-Glo 3/7 reagent (#TB323; Promega) was then added and luminescence was measured after 1h incubation at room temperature. The caspase 3/7 activities were divided by the cell viabilities and then normalized to their respective controls.

## References

1. Chung, V.Y.; Tan, T.Z.; Ye, J.; Huang, R.Y.-J.; Lai, H.-C.; Kappei, D.; Wollmann, H.; Guccione, E.; Huang, R.Y.-J. The role of GRHL2 and epigenetic remodeling in epithelial-mesenchymal plasticity in ovarian cancer cells. *Commun. Biol.* **2019**, *2*, 272–15, doi:10.1038/s42003-019-0506-3.
2. Yun, J.; Song, S.; Kim, H.; Han, S.; Yi, E.C.; Kim, T. Dynamic cohesin-mediated chromatin architecture controls epithelial-mesenchymal plasticity in cancer. *EMBO Rep.* **2016**, *17*, 1343–1359, doi:10.15252/embr.201541852
